# Supplementary material
Source: PubMed Central journal article supplement (PMC5650506)
Supplement: NIHMS906697-supplement-supplement_1.pdf [file NIHMS906697-supplement-supplement_1.pdf]

**Supplementary Table 1.** Experimental parameters (factors) and levels for formulations containing lactose or trehalose, leucine, pluronic F68 and PEG.

| <b>Parameter</b>             | <b>Level</b> |          |          |
|------------------------------|--------------|----------|----------|
|                              | <b>1</b>     | <b>2</b> | <b>3</b> |
| Lactose or Trehalose (mg/mL) | 0            | 6        | 12       |
| Leucine (mg/mL)              | 0            | 2.8      | 5.5      |
| Pluronic F68 %(v/v)          | 0            | 0.27     | 0.54     |
| PEG (mg/mL)                  | 0            | 5        | 10       |

**Supplementary Table 2.** Experimental parameters (factors) and levels for formulations containing mannitol, glycine, leucine, pluronic F68 and PEG.

| <b>Parameter</b>    | <b>Levels</b> |          |          |
|---------------------|---------------|----------|----------|
|                     | <b>1</b>      | <b>2</b> | <b>3</b> |
| Mannitol (mg/mL)    | 0             | 6        | 12       |
| Glycine (mg/mL)     | 0             | 10       | 20       |
| Leucine (mg/mL)     | 0             | 2.8      | 5.5      |
| Pluronic F68 %(v/v) | 0             | 0.27     | 0.54     |
| PEG (mg/mL)         | 0             | 5        | 10       |

**Supplementary Table 3.** Master table enlisting formulation information of all the phage formulations produced in this study.

| Phage | Formulation composition (mg/mL) |         |         |              |         |
|-------|---------------------------------|---------|---------|--------------|---------|
|       | Trehalose                       | lactose | Leucine | Pluronic F68 | PEG3000 |
| PEV1  |                                 |         | 2.8     | 0.0027       | 5       |
|       |                                 |         | 5.5     | 0.0054       | 10      |
|       | 6                               |         |         | 0.0027       | 10      |
|       | 6                               |         | 2.8     | 0.0054       |         |
|       | 6                               |         | 5.5     |              | 5       |
|       | 10                              |         | 15      |              |         |
|       | 12                              |         |         | 0.0054       | 5       |
|       | 12                              |         | 2.8     |              | 10      |
|       | 12                              |         | 5.5     | 0.0027       |         |
|       | 14                              |         | 11      |              |         |
|       | 17                              |         | 8       |              |         |
|       | 20                              |         | 5       |              |         |
|       | 23                              |         | 2       |              |         |
|       |                                 |         | 2.8     | 0.0027       | 5       |
|       |                                 |         | 5.5     | 0.0054       | 10      |
|       |                                 | 6       |         | 0.0027       | 10      |
|       |                                 | 6       | 2.8     | 0.0054       |         |
|       |                                 | 6       | 5.5     |              | 5       |
|       |                                 | 10      | 15      |              |         |
|       |                                 | 12      |         | 0.0054       | 5       |
|       |                                 | 12      | 2.8     |              | 10      |
|       |                                 | 12      | 5.5     | 0.0027       |         |
|       |                                 | 14      | 11      |              |         |
|       | 17                              | 8       |         |              |         |
|       | 20                              | 5       |         |              |         |
|       | 23                              | 2       |         |              |         |
| PEV20 |                                 |         | 2.8     | 0.0027       | 5       |
|       |                                 |         | 5.5     | 0.0054       | 10      |
|       | 6                               |         |         | 0.0027       | 10      |
|       | 6                               |         | 2.8     | 0.0054       |         |
|       | 6                               |         | 5.5     |              | 5       |
|       | 10                              |         | 15      |              |         |
|       | 12                              |         |         | 0.0054       | 5       |
|       | 12                              |         | 2.8     |              | 10      |
|       | 12                              |         | 5.5     | 0.0027       |         |
|       | 14                              |         | 11      |              |         |
|       | 17                              |         | 8       |              |         |
|       | 20                              |         | 5       |              |         |
|       | 23                              |         | 2       |              |         |

|       |    |     |        |    |
|-------|----|-----|--------|----|
|       |    | 2.8 | 0.0027 | 5  |
|       |    | 5.5 | 0.0054 | 10 |
|       | 6  |     | 0.0027 | 10 |
|       | 6  | 2.8 | 0.0054 |    |
|       | 6  | 5.5 |        | 5  |
|       | 10 | 15  |        |    |
|       | 12 |     | 0.0054 | 5  |
|       | 12 | 2.8 |        | 10 |
|       | 12 | 5.5 | 0.0027 |    |
|       | 14 | 11  |        |    |
|       | 17 | 8   |        |    |
|       | 20 | 5   |        |    |
|       | 23 | 2   |        |    |
| PEV61 |    | 2.8 | 0.0027 | 5  |
|       |    | 5.5 | 0.0054 | 10 |
|       | 6  |     | 0.0027 | 10 |
|       | 6  | 2.8 | 0.0054 |    |
|       | 6  | 5.5 |        | 5  |
|       | 10 | 15  |        |    |
|       | 12 |     | 0.0054 | 5  |
|       | 12 | 2.8 |        | 10 |
|       | 12 | 5.5 | 0.0027 |    |
|       | 14 | 11  |        |    |
|       | 17 | 8   |        |    |
|       | 20 | 5   |        |    |
|       | 23 | 2   |        |    |
|       |    | 2.8 | 0.0027 | 5  |
|       |    | 5.5 | 0.0054 | 10 |
|       | 6  |     | 0.0027 | 10 |
|       | 6  | 2.8 | 0.0054 |    |
|       | 6  | 5.5 |        | 5  |
|       | 10 | 15  |        |    |
|       | 12 |     | 0.0054 | 5  |
|       | 12 | 2.8 |        | 10 |
|       | 12 | 5.5 | 0.0027 |    |
|       | 14 | 11  |        |    |
|       | 17 | 8   |        |    |
|       | 20 | 5   |        |    |
|       | 23 | 2   |        |    |
